# Supplementary material for: Big Data and Machine Learning to Improve European Grapevine Moth (Lobesia botrana) Predictions
Source: MDPI journal article supplement (doi:10.3390/plants12030633), 2023-02-01
Supplement: s1 [file s1]

# Big Data and Machine Learning to Improve European Grapevine Moth (*Lobesia botrana*) Predictions

J. Balduque-Gil, F.J. Lacueva-Pérez, G. Labata-Lezaun, R. del-Hoyo-Alonso, S. Ilarri, E. Sánchez-Hernández, P. Martín-Ramos, and J.J. Barriuso-Vargas

## SUPPORTING INFORMATION

**Table S1.** Parameters recorded daily every 30 minutes by the weather stations used in the modeling.

| Parameter                 | Measurement unit |
|---------------------------|------------------|
| Temperature               | °C               |
| Relative humidity         | %                |
| Wind speed                | m/s              |
| Wind direction            | °                |
| Solar radiation           | W/m <sup>2</sup> |
| Accumulated precipitation | mm               |

**Table S2.** List of SiAR weather stations used for modeling.

| Code | Longitude | Latitude  | Altitude |
|------|-----------|-----------|----------|
| Z01  | -1.329722 | 41.451944 | 395      |
| Z05  | -1.281944 | 41.583056 | 327      |
| Z14  | -1.507500 | 41.855000 | 376      |
| Z15  | -1.745833 | 41.916111 | 521      |
| Z18  | -1.424444 | 41.108056 | 747      |
| Z22  | -1.249444 | 41.843056 | 226      |
| Z24  | -1.614620 | 41.362900 | 523      |

**Table S3.** Stages of development and sum of cumulative temperatures required according to the Touzeau model.

| Stage                                                                  | Temperature Sum (Tou) | Accumulated Temperature Sum (Tou) |
|------------------------------------------------------------------------|-----------------------|-----------------------------------|
| Maximum flight 1 <sup>st</sup> Generation                              | 125                   | 125                               |
| Egg eclosion 1 <sup>st</sup> Generation                                | 75                    | 200                               |
| Larval development                                                     | 170                   | 370                               |
| Pupal formation and adult appearance of 2 <sup>nd</sup> Generation     | 130                   | 500                               |
| Egg eclosion 2 <sup>nd</sup> Generation                                | 65                    | 565                               |
| Larval development                                                     | 255                   | 820                               |
| Chrysalis formation and adult appearance of 3 <sup>rd</sup> Generation | 130                   | 950                               |
| Egg eclosion 3 <sup>rd</sup> Generation                                | 75                    | 1025                              |

**Table S4.** Monitoring sites used for validation of the Touzeau model.

| <b>Code</b>    | <b>Altitude (m)</b> | <b>Latitude</b> | <b>Longitude</b> |
|----------------|---------------------|-----------------|------------------|
| 50004A03400175 | 671                 | 41.34436        | -1.28833         |
| 50024A00300013 | 435                 | 41.43628        | -1.30584         |
| 50073A00700043 | 530                 | 41.38521        | -1.19748         |
| 50073A01000009 | 632                 | 41.35815        | -1.16129         |
| 50073A02700014 | 626                 | 41.33168        | -1.24124         |
| 50073A03400128 | 556                 | 41.37100        | -1.24282         |
| 50073A03500094 | 493                 | 41.40490        | -1.23058         |
| 50073A04100021 | 517                 | 41.39011        | -1.20791         |
| 50073A04800016 | 582                 | 41.36016        | -1.18331         |
| 50073A05800042 | 664                 | 41.32108        | -1.17023         |
| 50073A08400031 | 565                 | 41.35638        | -1.20710         |
| 50073A08900011 | 616                 | 41.33819        | -1.18215         |
| 50073A09500073 | 613                 | 41.32603        | -1.20547         |
| 50073A10000051 | 595                 | 41.33764        | -1.21614         |
| 50098A03000027 | 719                 | 41.29084        | -1.25558         |
| 50201A00200124 | 702                 | 41.29448        | -1.22502         |
| 50201A02200012 | 716                 | 41.28343        | -1.20595         |
| 50268A00100050 | 657                 | 41.34200        | -1.13889         |

**Table S5.** Monitoring sites used for validation of the ML models.

| <b>Code</b>    | <b>Altitude (m)</b> | <b>Latitude</b> | <b>Longitude</b> |
|----------------|---------------------|-----------------|------------------|
| 50002A00400047 | 860                 | 41.17790        | -1.60215         |
| 50006A03800131 | 571                 | 41.76361        | -1.54832         |
| 50046A01700135 | 669                 | 41.31718        | -1.52381         |
| 50055A02700794 | 400                 | 41.85982        | -1.52577         |
| 50055A05900072 | 515                 | 41.81587        | -1.58083         |
| 50061A00700009 | 434                 | 41.80252        | -1.49993         |
| 50073A01000013 | 613                 | 41.35465        | -1.16592         |
| 50073A04800016 | 582                 | 41.36016        | -1.18331         |
| 50073A07600105 | 556                 | 41.35884        | -1.23050         |
| 50088A00400051 | 528                 | 41.39414        | -1.27336         |
| 50088A02900241 | 578                 | 41.37768        | -1.26875         |
| 50144A50100067 | 588                 | 41.38704        | -1.13643         |
| 50252A03500186 | 730                 | 41.68100        | -1.52724         |
| 50252A03500186 | 730                 | 41.68100        | -1.52724         |
| 50252A03500186 | 730                 | 41.68100        | -1.52724         |
| 50284A01000052 | 635                 | 41.25696        | -1.60230         |
| 50284A01000052 | 635                 | 41.25696        | -1.60230         |
| 50295A03000033 | 638                 | 41.36349        | -1.08042         |
